# Supplementary material for: In silico studies of a novel scaffold of benzoxazole derivatives as anticancer agents by 3D-QSAR, molecular docking and molecular dynamics simulations
Source: Royal Society of Chemistry journal article supplement (doi:10.1039/d3ra01316b), 2023-01-01
Supplement: d3ra01316b1.pdf [file d3ra01316b1.pdf]

**In silico studies of novel scaffold of benzoxazole derivatives as anticancer agents  
by 3D-QSAR, molecular docking and molecular dynamics simulations**

**Yuhan Jiang<sup>a1</sup>, Wei Yang<sup>b1</sup>, Fangfang Wang<sup>a\*</sup>, Bo Zhou<sup>c</sup>**

<sup>a</sup>School of Life Science, Linyi University, Linyi, 276000, China;

<sup>b</sup>National Clinical Research Center for Infectious Diseases, Shenzhen Third People's Hospital, Shenzhen, 518112, China;

<sup>c</sup>State Key Laboratory of Functions and Applications of Medicinal Plants, College of Basic Medical, Guizhou Medical University, Guizhou, 550004, China.

<sup>1</sup> These authors contributed equally to this work.

\* Corresponding author

E-mail: yu100288@163.com

Table S1. Summary of ligand-based QSAR results for HepG2 compounds.

|                           | CoMFA  | CoMSIA |        |        |        |        |        |        |        |
|---------------------------|--------|--------|--------|--------|--------|--------|--------|--------|--------|
|                           | SE     | S      | E      | H      | D      | A      | SE     | SH     | SD     |
| $R^2_{cv}$                | 0.509  | 0.607  | 0.507  | 0.342  | 0.719  | 0.361  | 0.572  | 0.447  | 0.711  |
| $R^2_{ncv}$               | 0.904  | 0.876  | 0.850  | 0.752  | 0.848  | 0.606  | 0.897  | 0.804  | 0.865  |
| SEE                       | 0.134  | 0.152  | 0.167  | 0.208  | 0.163  | 0.262  | 0.138  | 0.185  | 0.153  |
| F                         | 44.077 | 32.928 | 26.444 | 22.739 | 41.841 | 11.533 | 40.842 | 30.678 | 48.191 |
| $R^2_{pred}$              | 0.5128 | 0.4455 | 0.6391 | 0.2516 | 0.6538 | 0.4507 | 0.5873 | 0.3255 | 0.6198 |
| SEP                       | 0.302  | 0.271  | 0.303  | 0.338  | 0.221  | 0.333  | 0.282  | 0.310  | 0.224  |
| $N_C$                     | 3      | 3      | 3      | 2      | 2      | 2      | 3      | 2      | 2      |
| <b>Field contribution</b> |        |        |        |        |        |        |        |        |        |
| S                         | 0.729  | 1.000  | -      | -      | -      | -      | 0.575  | 0.414  | 0.262  |
| E                         | 0.271  | -      | 1.000  | -      | -      | -      | 0.425  | -      | -      |
| H                         | -      | -      | -      | 1.000  | -      | -      | -      | 0.586  | -      |
| D                         | -      | -      | -      | -      | 1.000  | -      | -      | -      | 0.738  |
| A                         | -      | -      | -      | -      | -      | 1.000  | -      | -      | -      |
| <b>CoMSIA</b>             |        |        |        |        |        |        |        |        |        |
|                           | SA     | EH     | ED     | EA     | HD     | HA     | DA     | SEH    | SED    |
| $R^2_{cv}$                | 0.519  | 0.400  | 0.633  | 0.457  | 0.646  | 0.383  | 0.649  | 0.458  | 0.634  |
| $R^2_{ncv}$               | 0.852  | 0.883  | 0.797  | 0.827  | 0.840  | 0.677  | 0.817  | 0.890  | 0.812  |
| SEE                       | 0.166  | 0.147  | 0.188  | 0.180  | 0.167  | 0.237  | 0.179  | 0.143  | 0.181  |
| F                         | 29.965 | 35.343 | 29.524 | 22.245 | 39.247 | 15.707 | 33.403 | 37.712 | 32.419 |
| $R^2_{pred}$              | 0.5429 | 0.6632 | 0.5197 | 0.6469 | 0.5385 | 0.3447 | 0.5732 | 0.5884 | 0.5097 |
| SEP                       | 0.299  | 0.334  | 0.252  | 0.318  | 0.248  | 0.328  | 0.247  | 0.318  | 0.252  |
| $N_C$                     | 3      | 3      | 2      | 3      | 2      | 2      | 2      | 3      | 2      |
| <b>Field contribution</b> |        |        |        |        |        |        |        |        |        |
| S                         | 0.497  | -      | -      | -      | -      | -      | -      | 0.328  | 0.205  |
| E                         | -      | 0.377  | 0.311  | 0.424  | -      | -      | -      | 0.260  | 0.247  |
| H                         | -      | 0.623  | -      | -      | 0.330  | 0.468  | -      | 0.411  | -      |
| D                         | -      | -      | 0.689  | -      | 0.670  | -      | 0.633  | -      | 0.548  |
| A                         | 0.503  | -      | -      | 0.576  | -      | 0.532  | 0.367  | -      | -      |

| CoMSIA                         |        |        |        |        |        |        |        |        |        |
|--------------------------------|--------|--------|--------|--------|--------|--------|--------|--------|--------|
|                                | SEA    | SHD    | SHA    | SDA    | EHD    | EHA    | EDA    | HDA    | SEHD   |
| R <sup>2</sup> <sub>cv</sub>   | 0.539  | 0.647  | 0.447  | 0.654  | 0.592  | 0.434  | 0.592  | 0.601  | 0.597  |
| R <sup>2</sup> <sub>ncv</sub>  | 0.874  | 0.850  | 0.738  | 0.832  | 0.792  | 0.880  | 0.774  | 0.805  | 0.805  |
| SEE                            | 0.153  | 0.161  | 0.214  | 0.171  | 0.190  | 0.149  | 0.198  | 0.184  | 0.184  |
| F                              | 32.487 | 42.630 | 21.084 | 37.139 | 28.554 | 34.366 | 25.635 | 31.050 | 30.874 |
| R <sup>2</sup> <sub>pred</sub> | 0.5998 | 0.5221 | 0.3618 | 0.5577 | 0.4582 | 0.6663 | 0.4931 | 0.4947 | 0.4554 |
| SEP                            | 0.293  | 0.248  | 0.310  | 0.245  | 0.266  | 0.325  | 0.266  | 0.263  | 0.265  |
| N <sub>C</sub>                 | 3      | 2      | 2      | 2      | 2      | 3      | 2      | 2      | 2      |
| Field contribution             |        |        |        |        |        |        |        |        |        |
| S                              | 0.366  | 0.192  | 0.254  | 0.184  | -      | -      | -      | -      | 0.161  |
| E                              | 0.269  | -      | -      | -      | 0.228  | 0.246  | 0.221  | -      | 0.192  |
| H                              |        | 0.265  | 0.353  | -      | 0.255  | 0.419  | -      | 0.239  | 0.213  |
| D                              | -      | 0.543  | -      | 0.523  | 0.517  | -      | 0.491  | 0.485  | 0.435  |
| A                              | 0.365  | -      | 0.393  | 0.294  | -      | 0.334  | 0.288  | 0.276  | -      |
| CoMSIA                         |        |        |        |        |        |        |        |        |        |
|                                | SEHA   | SEDA   | SHDA   | EHDA   |        |        | SEHDA  |        |        |
| R <sup>2</sup> <sub>cv</sub>   | 0.477  | 0.599  | 0.609  | 0.564  |        |        | 0.571  |        |        |
| R <sup>2</sup> <sub>ncv</sub>  | 0.886  | 0.788  | 0.819  | 0.893  |        |        | 0.783  |        |        |
| SEE                            | 0.146  | 0.192  | 0.177  | 0.141  |        |        | 0.194  |        |        |
| F                              | 36.272 | 27.933 | 33.905 | 38.938 |        |        | 27.017 |        |        |
| R <sup>2</sup> <sub>pred</sub> | 0.6092 | 0.4877 | 0.4908 | 0.8013 |        |        | 0.4466 |        |        |
| SEP                            | 0.312  | 0.264  | 0.261  | 0.285  |        |        | 0.273  |        |        |
| N <sub>C</sub>                 | 3      | 2      | 2      | 3      |        |        | 2      |        |        |
| Field contribution             |        |        |        |        |        |        |        |        |        |
| S                              | 0.244  | 0.154  | 0.147  |        | -      |        |        | 0.128  |        |
| E                              | 0.189  | 0.188  | -      |        | 0.128  |        |        | 0.155  |        |
| H                              | 0.310  | -      |        | 0.204  | 0.209  |        |        | 0.171  |        |
| D                              | -      |        | 0.419  | 0.417  | 0.479  |        |        | 0.349  |        |
| A                              | 0.257  | 0.239  | 0.232  |        | 0.184  |        |        | 0.197  |        |

Table S2. Summary of ligand-based QSAR results for HCT-116 compounds.

|                                | CoMFA  | CoMSIA |        |        |        |        |        |        |        |
|--------------------------------|--------|--------|--------|--------|--------|--------|--------|--------|--------|
|                                | SE     | S      | E      | H      | D      | A      | SE     | SH     | SD     |
| R <sup>2</sup> <sub>cv</sub>   | 0.574  | 0.474  | 0.407  | 0.434  | 0.385  | 0.480  | 0.542  | 0.467  | 0.450  |
| R <sup>2</sup> <sub>ncv</sub>  | 0.746  | 0.680  | 0.839  | 0.768  | 0.693  | 0.857  | 0.891  | 0.733  | 0.724  |
| SEE                            | 0.171  | 0.192  | 0.140  | 0.163  | 0.188  | 0.132  | 0.116  | 0.175  | 0.178  |
| F                              | 49.903 | 36.071 | 41.627 | 56.377 | 38.394 | 48.016 | 65.120 | 46.649 | 44.635 |
| R <sup>2</sup> <sub>pred</sub> | 0.5597 | 0.3277 | 0.3039 | 0.3919 | 0.1521 | 0.3150 | 0.1537 | 0.3615 | 0.2406 |
| SEP                            | 0.222  | 0.246  | 0.269  | 0.255  | 0.266  | 0.252  | 0.237  | 0.248  | 0.252  |
| N <sub>C</sub>                 | 1      | 1      | 2      | 1      | 1      | 2      | 2      | 1      | 1      |
| Field contribution             |        |        |        |        |        |        |        |        |        |
| S                              | 0.623  | 1.000  | -      | -      | -      | -      | 0.495  | 0.481  | 0.369  |

|                           |        |         |         |         |         |         |         |         |         |
|---------------------------|--------|---------|---------|---------|---------|---------|---------|---------|---------|
| E                         | 0.377  | -       | 1.000   | -       | -       | -       | 0.505   | -       | -       |
| H                         | -      | -       | -       | 1.000   | -       | -       | -       | 0.519   | -       |
| D                         | -      | -       | -       | -       | 1.000   | -       | -       | -       | 0.631   |
| A                         | -      | -       | -       | -       | -       | 1.000   | -       | -       | -       |
| <b>CoMSIA</b>             |        |         |         |         |         |         |         |         |         |
|                           | SA     | EH      | ED      | EA      | HD      | HA      | DA      | SEH     | SED     |
| $R^2_{cv}$                | 0.484  | 0.488   | 0.531   | 0.509   | 0.492   | 0.510   | 0.416   | 0.509   | 0.579   |
| $R^2_{ncv}$               | 0.857  | 0.997   | 0.984   | 0.887   | 0.988   | 0.915   | 0.918   | 0.919   | 0.985   |
| SEE                       | 0.132  | 0.022   | 0.047   | 0.117   | 0.040   | 0.102   | 0.100   | 0.100   | 0.046   |
| F                         | 48.120 | 574.046 | 218.135 | 63.021  | 297.181 | 85.610  | 89.534  | 90.607  | 232.553 |
| $R^2_{pred}$              | 0.1804 | 0.1449  | 0.5804  | 0.3336  | 0.2428  | 0.2357  | 0.1738  | 0.1446  | 0.2938  |
| SEP                       | 0.251  | 0.302   | 0.256   | 0.245   | 0.267   | 0.245   | 0.267   | 0.245   | 0.243   |
| $N_C$                     | 2      | 7       | 4       | 2       | 4       | 2       | 2       | 2       | 4       |
| <b>Field contribution</b> |        |         |         |         |         |         |         |         |         |
| S                         | 0.385  | -       | -       | -       | -       | -       | -       | 0.295   | 0.205   |
| E                         | -      | 0.418   | 0.375   | 0.378   | -       | -       | -       | 0.306   | 0.247   |
| H                         | -      | 0.582   | -       | -       | 0.439   | 0.456   | -       | 0.399   | -       |
| D                         | -      | -       | 0.625   | -       | 0.561   | -       | 0.540   | -       | 0.548   |
| A                         | 0.615  | -       | -       | 0.622   | -       | 0.544   | 0.460   | -       | -       |
| <b>CoMSIA</b>             |        |         |         |         |         |         |         |         |         |
|                           | SEA    | SHD     | SHA     | SDA     | EHD     | EHA     | EDA     | HDA     | SEHD    |
| $R^2_{cv}$                | 0.533  | 0.490   | 0.496   | 0.462   | 0.558   | 0.532   | 0.509   | 0.485   | 0.562   |
| $R^2_{ncv}$               | 0.894  | 0.994   | 0.899   | 0.915   | 0.988   | 0.927   | 0.986   | 0.950   | 0.988   |
| SEE                       | 0.114  | 0.031   | 0.111   | 0.102   | 0.040   | 0.094   | 0.044   | 0.078   | 0.041   |
| F                         | 67.169 | 330.818 | 70.973  | 86.166  | 297.682 | 101.769 | 246.278 | 152.388 | 285.91  |
| $R^2_{pred}$              | 0.2097 | 0.2466  | 0.1689  | 0.1323  | 0.2533  | 0.2510  | 0.3631  | 0.1732  | 0.1983  |
| SEP                       | 0.239  | 0.288   | 0.248   | 0.257   | 0.249   | 0.239   | 0.262   | 0.251   | 0.248   |
| $N_C$                     | 2      | 6       | 2       | 2       | 4       | 2       | 4       | 2       | 4       |
| <b>Field contribution</b> |        |         |         |         |         |         |         |         |         |
| S                         | 0.282  | 0.205   | 0.248   | 0.219   | -       | -       | -       | -       | 0.173   |
| E                         | 0.277  | -       | -       | -       | 0.235   | 0.247   | 0.233   | -       | 0.199   |
| H                         |        | 0.344   | 0.340   | -       | 0.328   | 0.346   | -       | 0.278   | 0.260   |
| D                         | -      | 0.451   | -       | 0.431   | 0.437   | -       | 0.421   | 0.398   | 0.369   |
| A                         | 0.441  | -       | 0.412   | 0.350   | -       | 0.407   | 0.345   | 0.324   | -       |
| <b>CoMSIA</b>             |        |         |         |         |         |         |         |         |         |
|                           | SEHA   | SEDA    | SHDA    | EHDA    | SEHDA   |         |         |         |         |
| $R^2_{cv}$                | 0.533  | 0.520   | 0.494   | 0.540   | 0.536   |         |         |         |         |
| $R^2_{ncv}$               | 0.918  | 0.976   | 0.938   | 0.988   | 0.983   |         |         |         |         |
| SEE                       | 0.100  | 0.056   | 0.087   | 0.041   | 0.047   |         |         |         |         |
| F                         | 89.127 | 204.729 | 121.252 | 289.362 | 296.417 |         |         |         |         |
| $R^2_{pred}$              | 0.1880 | 0.3462  | 0.1408  | 0.2231  | 0.2375  |         |         |         |         |
| SEP                       | 0.239  | 0.250   | 0.249   | 0.254   | 0.246   |         |         |         |         |

|                           |       |       |       |       |       |
|---------------------------|-------|-------|-------|-------|-------|
| N <sub>C</sub>            | 2     | 3     | 2     | 4     | 3     |
| <b>Field contribution</b> |       |       |       |       |       |
| S                         | 0.202 | 0.179 | 0.165 | -     | 0.134 |
| E                         | 0.202 | 0.194 | -     | 0.171 | 0.151 |
| H                         | 0.272 | -     | 0.228 | 0.244 | 0.205 |
| D                         | -     | 0.34  | 0.339 | 0.330 | 0.288 |
| A                         | 0.324 | 0.278 | 0.267 | 0.256 | 0.221 |

Table S3. Summary of ligand-based QSAR results for MCF-7 compounds.

|                                | CoMFA  | CoMSIA  |         |        |         |        |         |        |         |
|--------------------------------|--------|---------|---------|--------|---------|--------|---------|--------|---------|
|                                | SE     | S       | E       | H      | D       | A      | SE      | SH     | SD      |
| R <sup>2</sup> <sub>cv</sub>   | 0.568  | 0.471   | 0.469   | 0.419  | 0.326   | 0.464  | 0.495   | 0.460  | 0.417   |
| R <sup>2</sup> <sub>ncv</sub>  | 0.755  | 0.694   | 0.998   | 0.769  | 0.683   | 0.880  | 0.898   | 0.741  | 0.906   |
| SEE                            | 0.157  | 0.176   | 0.021   | 0.153  | 0.179   | 0.113  | 0.105   | 0.162  | 0.100   |
| F                              | 52.355 | 38.467  | 381.50  | 56.704 | 36.57   | 58.786 | 70.200  | 48.717 | 77.231  |
| R <sup>2</sup> <sub>pred</sub> | 0.5057 | 0.2397  | 0.3294  | 0.2996 | 0.1216  | 0.2370 | 0.1111  | 0.2681 | 0.1170  |
| SEP                            | 0.209  | 0.231   | 0.338   | 0.242  | 0.261   | 0.240  | 0.233   | 0.234  | 0.250   |
| N <sub>C</sub>                 | 1      | 1       | 10      | 1      | 1       | 2      | 2       | 1      | 2       |
| <b>Field contribution</b>      |        |         |         |        |         |        |         |        |         |
| S                              | 0.623  | 1.000   | -       | -      | -       | -      | 0.510   | 0.482  | 0.356   |
| E                              | 0.377  | -       | 1.000   | -      | -       | -      | 0.490   | -      | -       |
| H                              | -      | -       | -       | 1.000  | -       | -      | -       | 0.518  | -       |
| D                              | -      | -       | -       | -      | 1.000   | -      | -       | -      | 0.644   |
| A                              | -      | -       | -       | -      | -       | 1.000  | -       | -      | -       |
| <b>CoMSIA</b>                  |        |         |         |        |         |        |         |        |         |
|                                | SA     | EH      | ED      | EA     | HD      | HA     | DA      | SEH    | SED     |
| R <sup>2</sup> <sub>cv</sub>   | 0.467  | 0.450   | 0.669   | 0.465  | 0.490   | 0.488  | 0.373   | 0.471  | 0.509   |
| R <sup>2</sup> <sub>ncv</sub>  | 0.873  | 0.998   | 0.981   | 0.900  | 0.998   | 0.924  | 0.928   | 0.920  | 0.985   |
| SEE                            | 0.117  | 0.018   | 0.048   | 0.104  | 0.018   | 0.091  | 0.088   | 0.093  | 0.044   |
| F                              | 55.24  | 741.484 | 179.713 | 71.662 | 873.948 | 96.666 | 103.776 | 92.463 | 223.344 |
| R <sup>2</sup> <sub>pred</sub> | 0.1302 | 0.077   | 0.6577  | 0.2640 | 0.2910  | 0.1671 | 0.1724  | 0.1011 | 0.3056  |
| SEP                            | 0.239  | 0.293   | 0.255   | 0.240  | 0.270   | 0.235  | 0.260   | 0.238  | 0.246   |
| N <sub>C</sub>                 | 2      | 7       | 4       | 2      | 6       | 2      | 2       | 2      | 4       |
| <b>Field contribution</b>      |        |         |         |        |         |        |         |        |         |
| S                              | 0.385  | -       | -       | -      | -       | -      | -       | 0.303  | 0.260   |
| E                              | -      | 0.401   | 0.372   | 0.363  | -       | -      | -       | 0.292  | 0.273   |
| H                              | -      | 0.599   | -       | -      | 0.461   | 0.452  | -       | 0.405  | -       |
| D                              | -      | -       | 0.628   | -      | 0.539   | -      | 0.528   | -      | 0.467   |
| A                              | 0.615  | -       | -       | 0.637  | -       | 0.548  | 0.472   | -      | -       |
| <b>CoMSIA</b>                  |        |         |         |        |         |        |         |        |         |

|                           |        |         |         |         |         |        |         |         |         |
|---------------------------|--------|---------|---------|---------|---------|--------|---------|---------|---------|
|                           | SEA    | SHD     | SHA     | SDA     | EHD     | EHA    | EDA     | HDA     | SEHD    |
| $R^2_{cv}$                | 0.489  | 0.486   | 0.479   | 0.428   | 0.524   | 0.489  | 0.453   | 0.466   | 0.519   |
| $R^2_{ncv}$               | 0.901  | 0.997   | 0.908   | 0.923   | 0.990   | 0.931  | 0.989   | 0.985   | 0.990   |
| SEE                       | 0.103  | 0.020   | 0.099   | 0.091   | 0.034   | 0.086  | 0.036   | 0.041   | 0.035   |
| F                         | 72.96  | 684.409 | 78.891  | 96.339  | 360.437 | 107.47 | 319.894 | 333.532 | 343.714 |
| $R^2_{pred}$              | 0.1572 | 0.1961  | 0.1186  | 0.1205  | 0.2553  | 0.1877 | 0.4005  | 0.2708  | 0.1859  |
| SEP                       | 0.234  | 0.271   | 0.237   | 0.248   | 0.242   | 0.234  | 0.259   | 0.247   | 0.243   |
| $N_C$                     | 2      | 6       | 2       | 2       | 4       | 2      | 4       | 3       | 4       |
| <b>Field contribution</b> |        |         |         |         |         |        |         |         |         |
| S                         | 0.287  | 0.213   | 0.252   | 0.225   | -       | -      | -       | -       | 0.176   |
| E                         | 0.263  | -       | -       | -       | 0.222   | 0.236  | 0.223   | -       | 0.189   |
| H                         |        | 0.353   | 0.337   | -       | 0.336   | 0.348  | -       | 0.297   | 0.266   |
| D                         | -      | 0.434   | -       | 0.418   | 0.441   | -      | 0.420   | 0.379   | 0.369   |
| A                         | 0.450  | -       | 0.411   | 0.357   | -       | 0.416  | 0.357   | 0.324   | -       |
| <b>CoMSIA</b>             |        |         |         |         |         |        |         |         |         |
|                           | SEHA   | SEDA    | SHDA    | EHDA    | SEHDA   |        |         |         |         |
| $R^2_{cv}$                | 0.494  | 0.467   | 0.467   | 0.500   | 0.495   |        |         |         |         |
| $R^2_{ncv}$               | 0.921  | 0.978   | 0.946   | 0.986   | 0.986   |        |         |         |         |
| SEE                       | 0.092  | 0.050   | 0.077   | 0.039   | 0.040   |        |         |         |         |
| F                         | 93.547 | 220.818 | 138.839 | 364.732 | 351.075 |        |         |         |         |
| $R^2_{pred}$              | 0.1365 | 0.3591  | 0.1211  | 0.2931  | 0.2342  |        |         |         |         |
| SEP                       | 0.233  | 0.247   | 0.239   | 0.239   | 0.241   |        |         |         |         |
| $N_C$                     | 2      | 3       | 2       | 3       | 3       |        |         |         |         |
| <b>Field contribution</b> |        |         |         |         |         |        |         |         |         |
| S                         | 0.206  | 0.184   | 0.170   | -       | 0.138   |        |         |         |         |
| E                         | 0.191  | 0.186   | -       | 0.161   | 0.144   |        |         |         |         |
| H                         | 0.274  | -       | 0.230   | 0.246   | 0.207   |        |         |         |         |
| D                         | -      | 0.346   | 0.329   | 0.329   | 0.288   |        |         |         |         |
| A                         | 0.329  | 0.285   | 0.272   | 0.264   | 0.223   |        |         |         |         |

**Table S4.** The MM PB&GBSA energy terms calculated for the two MD systems.

| Energy Component    | Cpd11         | Cpd15        |
|---------------------|---------------|--------------|
| VDWAALS             | -63.61±3.52   | -54.35±6.03  |
| EEL                 | -124.62±29.9  | -31.62±54.54 |
| EGB                 | 139.92±27.92  | 61.9±47.47   |
| ESURF               | -8.08±0.27    | -7.08±0.88   |
| DELTA G gas         | -188.23±30.55 | -85.97±55.37 |
| DELTA G solv (GBSA) | 131.84±27.94  | 54.82±47.13  |
| GBSA                | -56.39±7.57   | -31.15±11.54 |
| EPB                 | 157.01±25.88  | 76.15±50.18  |
| ENPOLAR             | -5.89±0.16    | -5.26±0.38   |
| DELTA G solv (PBSA) | 151.13±25.86  | 70.89±50.04  |

|               |             |              |
|---------------|-------------|--------------|
| PBSA          | -37.11±7.05 | -15.08±26.59 |
| Translational | -13.28±0    | -13.21±0     |
| Rotational    | -11.7±0.05  | -11.49±0.06  |
| Vibrational   | -4.26±5.05  | -4.45±6.61   |
| DELTA entropy | -29.23±5.07 | -29.16±6.58  |
| GBSA(total)   | -27.16      | -1.99        |
| PBSA(total)   | -7.87       | 14.08        |

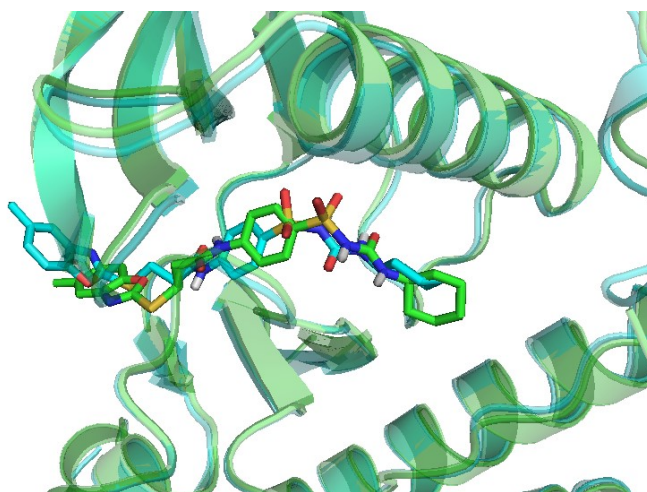

**Figure S1.** The docking pose of 1YWN-Cpd11 and 3VO3-Cpd11 (cyan=3VO3-Cpd11, green=1YWN-Cpd11).
